# Supplementary material
Source: publisher figshare collection journal article supplement (https://brill.figshare.com/articles/dataset/_/14420297)
Supplement: Supplementary file 1 [file 1]

## Sheet: Sheet1
Subject	Subject_code	Grade	Gender	Age	DS_first	Order_no_choice	RT_mean.LD.COMPUTE	RT_mean.LD.DECIDE	RT_mean.LD.DS	RT_mean.LD.DS.sec	RT_mean.LD.IA	RT_mean.LD.IA.sec	RT_mean.MD.COMPUTE	RT_mean.MD.DECIDE	RT_mean.MD.DS	RT_mean.MD.DS.sec	RT_mean.MD.IA	RT_mean.MD.IA.sec	RT_mean.SD.COMPUTE	RT_mean.SD.DECIDE	RT_mean.SD.DS	RT_mean.SD.DS.sec	RT_mean.SD.IA	RT_mean.SD.IA.sec	Difference_RT_LD	Difference_RT_MD	Difference_RT_SD	Mean_difference_RT	Mean_difference_RT_sec	Mean_RT_decide	Mean_RT_compute	Mean_RT_DS	Mean_RT_DS_sec	Mean_RT_IA	Mean_RT_IA_sec	Acc_mean.LD.COMPUTE	Acc_mean.LD.DS	Acc_mean.LD.IA	Acc_mean.MD.COMPUTE	Acc_mean.MD.DS	Acc_mean.MD.IA	Acc_mean.SD.COMPUTE	Acc_mean.SD.DS	Acc_mean.SD.IA	Difference_Acc_LD	Difference_Acc_MD	Difference_Acc_SD	Difference_Acc_mean	Mean_Accuracy_compute
1	351	5	1	11.95	1	DS	10038	2397	10656	10.66	13462.6	13.46	14884.6	6501.4	15826.6	15.83	10881.6	10.88	10448.6	6508.6	16083.2	16.08	8137	8.14	-2806.6	4945	7946.2	3361.53	3.36	5135.67	11790.4	14188.6	14.19	10827.1	10.83	0.8	0.8	0.8	1	0.8	1	1	1	0.8	0	-0.2	0.2	0	0.93
2	352	5	0	11.99	0	IA	20723.4	1704.2	14512.8	14.51	18738.4	18.74	28737.8	3369.8	26446.6	26.45	17950	17.95	12649.2	2490	18908.8	18.91	9476.4	9.48	-4225.6	8496.6	9432.4	4567.8	4.57	2521.33	20703.5	19956.1	19.96	15388.3	15.39	1	0.6	1	1	1	0.8	1	1	1	-0.4	0.2	0	-0.07	1
3	353	5	1	11.64	1	DS	18473	2047	11153	11.15	12327.6	12.33	13426	2028.8	17228.8	17.23	16300	16.3	13351.8	2154.8	11700.8	11.7	9886.6	9.89	-1174.6	928.8	1814.2	522.8	0.52	2076.87	15083.6	13360.9	13.36	12838.1	12.84	1	1	1	0.4	1	1	1	0.6	1	0	0	-0.4	-0.13	0.8
4	354	5	0	11.78	0	IA	34731.2	2455	18423.6	18.42	15510	15.51	16495.2	3742.4	18886.4	18.89	13505.6	13.51	9574	2477.4	22318.4	22.32	7528.4	7.53	2913.6	5380.8	14790	7694.8	7.69	2891.6	20266.8	19876.1	19.88	12181.3	12.18	0.8	1	0.8	0.8	1	1	1	1	1	0.2	0	0	0.07	0.87
5	355	5	1	11.99	1	DS	12840.8	4082.8	15626.6	15.63	19141.6	19.14	33678	4508	18590.4	18.59	12437.8	12.44	8330.8	4675	17590.2	17.59	7637.2	7.64	-3515	6152.6	9953	4196.87	4.2	4421.93	18283.2	17269.1	17.27	13072.2	13.07	0.6	1	0.8	0.2	0.6	1	1	1	1	0.2	-0.4	0	-0.07	0.6
6	356	5	1	11.84	0	IA	19033.6	1968.2	15424.4	15.42	18228.2	18.23	24660.6	4055	16820	16.82	17471.4	17.47	13514.6	2981.2	17672.8	17.67	8365.2	8.37	-2803.8	-651.4	9307.6	1950.8	1.95	3001.47	19069.6	16639.1	16.64	14688.3	14.69	0.4	0.2	1	0.8	0.6	0.6	1	1	0.8	-0.8	0	0.2	-0.2	0.73
7	357	5	0	11.99	1	DS	29655.6	2523.2	18481.4	18.48	54773.8	54.77	29229.2	3378.4	21590.2	21.59	25813.4	25.81	27305	3426.4	33462.6	33.46	19613.2	19.61	-36292.4	-4223.2	13849.4	-8888.73	-8.89	3109.33	28729.9	24511.4	24.51	33400.1	33.4	0.8	0.6	0	0.8	0.4	0.4	0.4	0.6	1	0.6	0	-0.4	0.07	0.67
8	358	5	1	12.36	0	IA	44460.2	3304.6	20058.6	20.06	22426.5	22.43	21307.4	4554.8	25958.4	25.96	16863	16.86	10180.8	4162.8	13820.2	13.82	12889.6	12.89	-2367.9	9095.4	930.6	2552.7	2.55	4007.4	25316.1	19945.7	19.95	17393	17.39	0.4	0.6	0.75	0.8	0.4	0.8	0.8	1	1	-0.15	-0.4	0	-0.18	0.67
9	371	5	1	11.79	1	DS	15537.2	2560.6	17156.8	17.16	18313.6	18.31	13088.8	3310.8	28618	28.62	14828	14.83	9025.6	2790.4	16849.4	16.85	11775.2	11.78	-1156.8	13790	5074.2	5902.47	5.9	2887.27	12550.5	20874.7	20.87	14972.3	14.97	0	0.8	0.6	0.5	0.8	0.75	1	0.8	1	0.2	0.05	-0.2	0.02	0.5
10	372	5	1	11.33	0	IA	14817.2	2883.2	17057.3	17.06	17017	17.02	19899.4	4166.6	15726	15.73	11263	11.26	7977.4	4108.2	18910.4	18.91	5211.8	5.21	40.25	4463	13698.6	6067.28	6.07	3719.33	14231.3	17231.2	17.23	11163.9	11.16	1	1	1	0.8	0.8	1	0.8	0.8	0.8	0	-0.2	0	-0.07	0.87
11	373	5	1	11.88	1	DS	36815.2	1763	19101.4	19.1	21651.8	21.65	24898.2	1770.8	30723.8	30.72	33817.8	33.82	17499.4	1999.6	25625.8	25.63	17686	17.69	-2550.4	-3094	7939.8	765.13	0.77	1844.47	26404.3	25150.3	25.15	24385.2	24.39	0.6	0.6	0.6	0.6	1	0.6	0.8	0.4	0.8	0	0.4	-0.4	0	0.67
12	374	5	0	11.79	0	IA	9523.6	1625	11681.2	11.68	9771.4	9.77	8959.6	1569.2	10500.6	10.5	10139.2	10.14	5997	1909	7779.2	7.78	5082.4	5.08	1909.8	361.4	2696.8	1656	1.66	1701.07	8160.07	9987	9.99	8331	8.33	0.4	0.8	0.4	0.8	0.6	0.8	0.8	1	0.8	0.4	-0.2	0.2	0.13	0.67
13	375	5	1	11.79	1	DS	11462.4	3055	18450	18.45	18128	18.13	21861.6	6117.4	25041.8	25.04	23327	23.33	5415.4	3699.2	11817.6	11.82	7863.2	7.86	322	1714.8	3954.4	1997.07	2	4290.53	12913.1	18436.5	18.44	16439.4	16.44	1	0.8	0.8	0.6	0.4	0.6	0.8	1	0.8	0	-0.2	0.2	0	0.8
14	376	5	1	11.79	0	IA	30764.2	3714	26181.6	26.18	15642.6	15.64	34210	5849.6	29589.2	29.59	21299.2	21.3	21904.4	4796	22412	22.41	8498.8	8.5	10539	8290	13913.2	10914.1	10.91	4786.53	28959.5	26060.9	26.06	15146.9	15.15	0.8	0.8	0.6	0.8	0.6	1	1	1	1	0.2	-0.4	0	-0.07	0.87
15	377	5	0	11.98	1	DS	39769	1738.4	25617.8	25.62	34827.8	34.83	23821.8	3381.4	29347	29.35	33087.6	33.09	16223.4	1973	17434.4	17.43	15918.2	15.92	-9210	-3740.6	1516.2	-3811.47	-3.81	2364.27	26604.7	24133.1	24.13	27944.5	27.94	0.8	0.6	0.6	0	0.4	0.6	0.6	0.2	1	0	-0.2	-0.8	-0.33	0.47
16	379	5	0	12.11	1	DS	16849.2	1984.2	21727	21.73	14091.8	14.09	18655.8	3068.6	22312.6	22.31	13258	13.26	7089.8	2193.6	19727	19.73	7238.8	7.24	7635.25	9054.6	12488.2	9726.02	9.73	2415.47	14198.3	21255.5	21.26	11529.5	11.53	1	0.8	1	0.8	1	0.8	1	0.6	1	-0.2	0.2	-0.4	-0.13	0.93
17	381	5	0	11.41	1	DS	18710	7226.4	27169.8	27.17	23887.4	23.89	28300.8	7084.4	27887.6	27.89	41604.2	41.6	19497.5	4815.8	26085	26.09	18653.4	18.65	3282.4	-13716.6	7431.6	-1000.87	-1	6375.53	22169.4	27047.5	27.05	28048.3	28.05	0.8	1	0.6	0.6	0.6	0.2	1	1	1	0.4	0.4	0	0.27	0.8
18	521	6	1	10.43	1	DS	9719.4	1883.6	17468	17.47	22369.8	22.37	15742.6	1863.4	17105.6	17.11	15581.6	15.58	15090	2342.8	15859.2	15.86	9845.2	9.85	-4901.75	1524	6014	878.75	0.88	2029.93	13517.3	16810.9	16.81	15932.2	15.93	0.6	0.8	1	0.6	0.6	0.6	0	0.6	1	-0.2	0	-0.4	-0.2	0.4
19	522	6	1	12.07	0	IA	15360	1972.4	9353.8	9.35	13999.2	14	21311	1568.8	15681.8	15.68	12160	12.16	5106.2	1536.75	12073.2	12.07	4760.4	4.76	-4645.4	3521.8	7312.8	2063.07	2.06	1692.65	13925.7	12369.6	12.37	10306.5	10.31	1	0.8	1	0.8	0.4	0.8	0.8	1	1	-0.2	-0.4	0	-0.2	0.87
20	523	6	0	10.58	1	DS	13620	3273.4	27234.2	27.23	18545	18.55	12357.4	3957	20450.4	20.45	13117.4	13.12	9236.6	3680.4	17563.4	17.56	10893.4	10.89	8689.2	7333	6670	7564.07	7.56	3636.93	11738	21749.3	21.75	14185.3	14.19	0.2	1	0.2	0.8	0.6	1	1	1	1	0.8	-0.4	0	0.13	0.67
21	524	6	1	10.46	0	IA	41103.4	2634.2	29221.2	29.22	37315.8	37.32	50036.2	3199	41808.6	41.81	45625.2	45.63	35250.6	3837	24302.6	24.3	17880.4	17.88	-8094.6	-3816.6	6422.2	-1829.67	-1.83	3223.4	42130.1	31777.5	31.78	33607.1	33.61	0.4	1	0.8	0.6	0.6	0.6	0	0.8	0.8	0.2	0	0	0.07	0.33
22	525	6	1	10.64	1	DS	10637.4	2778.6	8423	8.42	10132	10.13	8853.8	3411.5	9306.2	9.31	8948.6	8.95	7141	3455.6	11472.6	11.47	6851.4	6.85	-1709	357.6	4621.2	1089.93	1.09	3215.23	8877.4	9733.93	9.73	8644	8.64	1	1	1	1	1	1	0.6	0.8	1	0	0	-0.2	-0.07	0.87
23	526	6	1	10.68	0	IA	13208.4	2439.6	14543.4	14.54	11383.6	11.38	13942	3251.2	21834.6	21.83	8779.6	8.78	7758.6	2568.6	13146	13.15	6409.6	6.41	3159.8	13055	6736.4	7650.4	7.65	2753.13	11636.3	16508	16.51	8857.6	8.86	1	1	0.8	0.8	0.6	1	1	0.8	1	0.2	-0.4	-0.2	-0.13	0.93
24	528	6	0	11.07	0	IA	11506.6	1997.4	16669.4	16.67	22811.2	22.81	17249.4	3076.6	15824.8	15.82	19821.6	19.82	13299.5	2320.8	19621.4	19.62	12509.4	12.51	-6141.8	-3996.8	7112	-1008.87	-1.01	2464.93	14018.5	17371.9	17.37	18380.7	18.38	0.8	1	0.4	0.2	0	0.8	0.5	0	1	0.6	-0.8	-1	-0.4	0.5
25	561	6	1	10.18	1	DS	10417.4	3285.4	10361.6	10.36	22966.4	22.97	14323.4	3216	14260	14.26	13281.4	13.28	10287	4222.6	13816.5	13.82	4706.8	4.71	-12604.8	978.6	9109.7	-838.83	-0.84	3574.67	11675.9	12812.7	12.81	13651.5	13.65	1	0.6	1	0.6	0.8	1	0.8	1	1	-0.4	-0.2	0	-0.2	0.8
26	562	6	1	10.58	0	IA	16565.6	3009.8	17288.2	17.29	15107.3	15.11	21318	2386.2	18333.2	18.33	11810	11.81	7990.8	3553.5	17983	17.98	4958.6	4.96	2180.95	6523.2	13024.4	7242.85	7.24	2983.17	15291.5	17868.1	17.87	10625.3	10.63	1	0.8	0.6	0.8	1	1	1	0.8	1	0.2	0	-0.2	0	0.93
27	563	6	0	11.04	1	DS	17095	2178.6	15861.8	15.86	35132.2	35.13	20737.2	3654.5	15868.6	15.87	33785.8	33.79	18598.6	3214.8	12263.2	12.26	10477.8	10.48	-19270.4	-17917.2	1785.4	-11800.7	-11.8	3015.97	18810.3	14664.5	14.66	26465.3	26.47	0.6	1	1	0.4	1	0.8	0.8	1	1	0	0.2	0	0.07	0.6
28	564	6	1	10.74	0	IA	33924.8	3880.8	39372.8	39.37	17192.2	17.19	35405	5623	41343.2	41.34	19137.4	19.14	17861	3863.2	23389	23.39	9887.6	9.89	22180.6	22205.8	13501.4	19295.9	19.3	4455.67	29063.6	34701.7	34.7	15405.7	15.41	1	1	1	1	0.8	0.8	1	1	1	0	0	0	0	1
29	565	6	1	12.62	1	DS	27563.6	4802	31630.8	31.63	28089.4	28.09	44497.3	3776.6	38161.4	38.16	51768.2	51.77	56760.6	3789.8	23184.6	23.18	55745.4	55.75	3541.4	-13606.8	-32560.8	-14208.7	-14.21	4122.8	42940.5	30992.3	30.99	45201	45.2	0.8	0.8	0.8	1	0.6	0.6	0.6	0.8	0.8	0	0	0	0	0.8
30	566	6	1	11.73	0	IA	19426.5	6272.6	20752.8	20.75	22658.6	22.66	34466.2	4129.6	24679	24.68	16362	16.36	13436.6	2923.6	23968.4	23.97	11241.4	11.24	-1905.8	8317	12727	6379.4	6.38	4441.93	22443.1	23133.4	23.13	16754	16.75	0.25	0.8	0.8	0.6	0.2	0.6	1	1	1	0	-0.4	0	-0.13	0.62
[truncated: 42 more columns]
